# Supplementary material for: Tripod facial surfactants with benzene as the central core: design, synthesis and self-assembly study
Source: Royal Society of Chemistry journal article supplement (doi:10.1039/c2nj20876h), 2012-01-01
Supplement: c2nj20876h.pdf [file c2nj20876h.pdf]

## **Supporting information for**

### **Tripod facial surfactants with benzene as central core: design, synthesis and self-assembly study**

*Julien Dauvergne<sup>a,b</sup>, Anissa Bendjeriou<sup>a,b</sup>, Françoise Bonneté<sup>a,b</sup>, Joachim Kolhbrecher<sup>c</sup>, Bernard Pucci<sup>a,b</sup>, Laurie-Anne Barret<sup>a,b</sup> and Ange Polidori<sup>a,b,\*</sup>*

<sup>a</sup> Université d'Avignon et des Pays de Vaucluse, Faculté des Sciences, Équipe Chimie Bioorganique et Systèmes Amphiphiles,

33, rue Louis Pasteur, 84000 Avignon, France

Fax: (+33) 04 90 14 44 49, E-mail: [ange.polidori@univ-avignon.fr](mailto:ange.polidori@univ-avignon.fr);

<sup>b</sup> Institut des Biomolécules Max Mousseron, UMR 5247, CNRS - Universités Montpellier I et II  
15, avenue Charles Flahault, 34093 Montpellier cedex 05, France

<sup>c</sup> Laboratory for Neutron Scattering

Paul Scherrer Institut, 5232 Villigen PSI, Switzerland

| <b>Table of contents</b>                                         | <b>Page</b> |
|------------------------------------------------------------------|-------------|
| <b>1) <sup>1</sup>H and <sup>13</sup>C NMR Spectra scanned</b>   | <b>2</b>    |
| <b>2) Electron microscopy visualisation by negative staining</b> | <b>8</b>    |
| <b>3) Small Angle X-Ray Scattering data</b>                      | <b>10</b>   |

### <sup>1</sup>H NMR and <sup>13</sup>C NMR spectra scanned

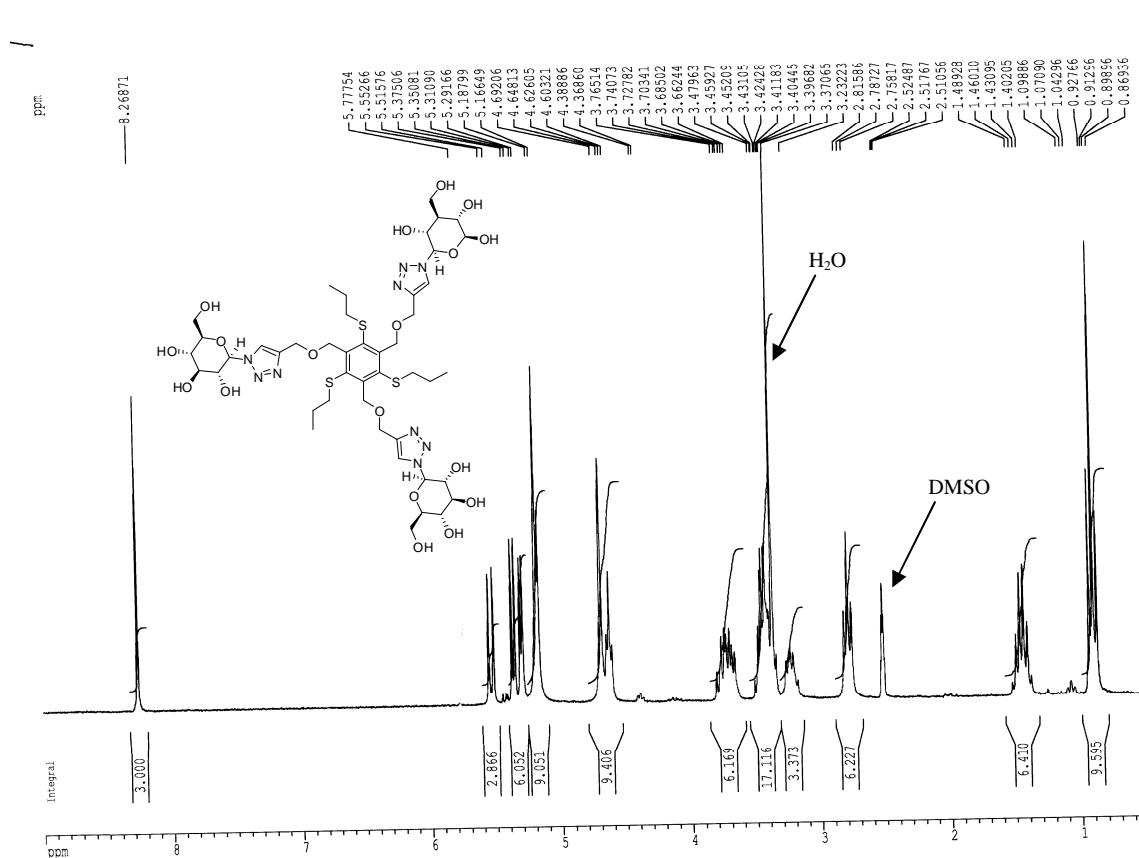

<sup>1</sup>H NMR (DMSO) for compound C3Glu3.

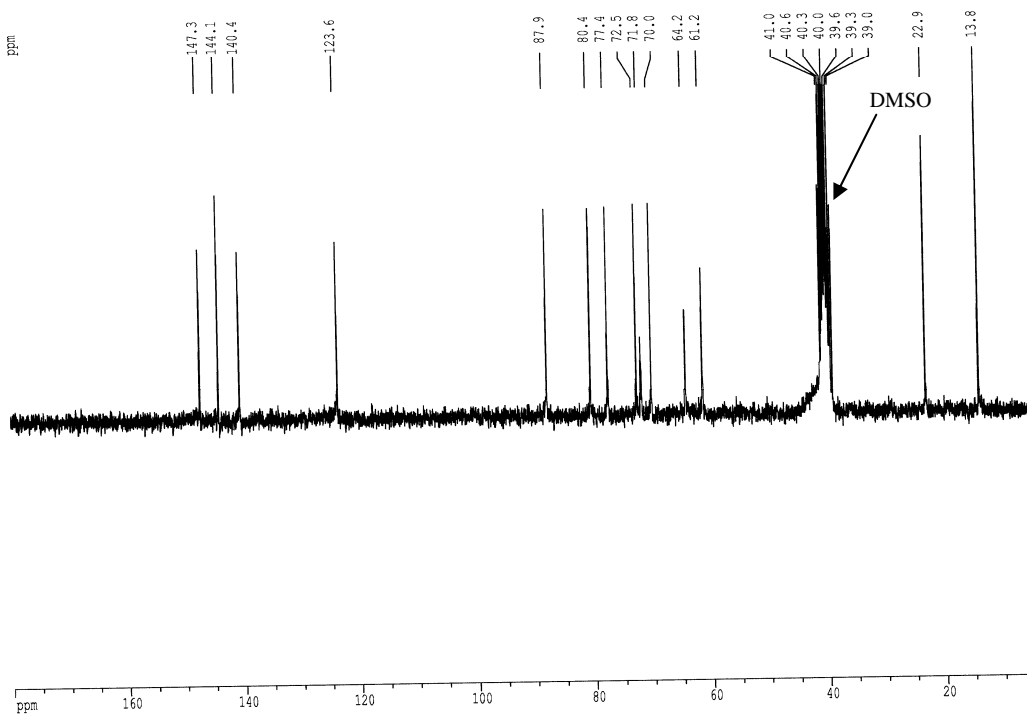

<sup>13</sup>C NMR (DMSO) for compound C3Glu3.

3

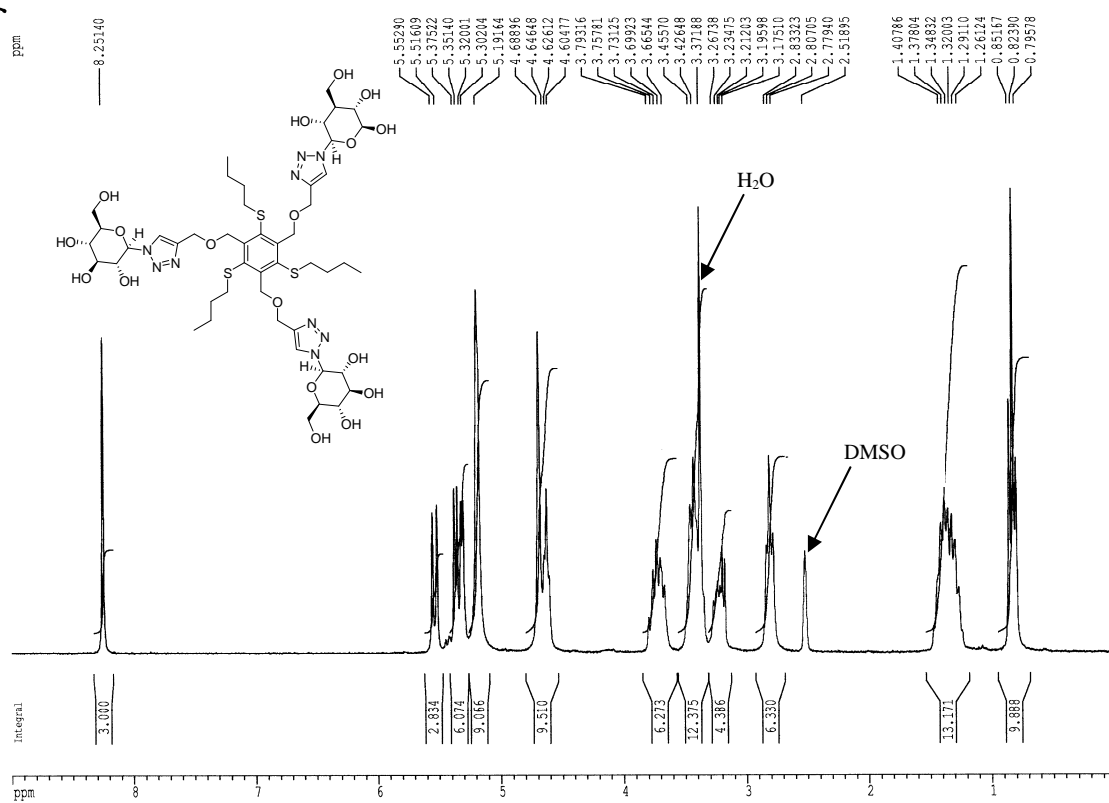

<sup>1</sup>H NMR (DMSO) for compound C4Glu3.

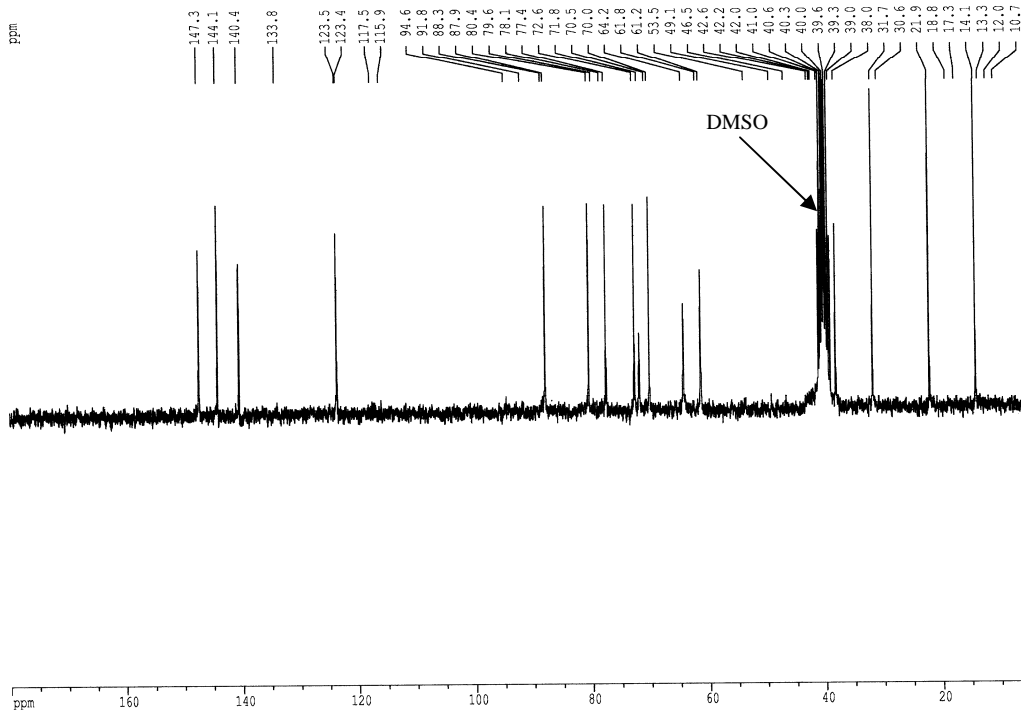

<sup>13</sup>C NMR (DMSO) for compound C4Glu3.

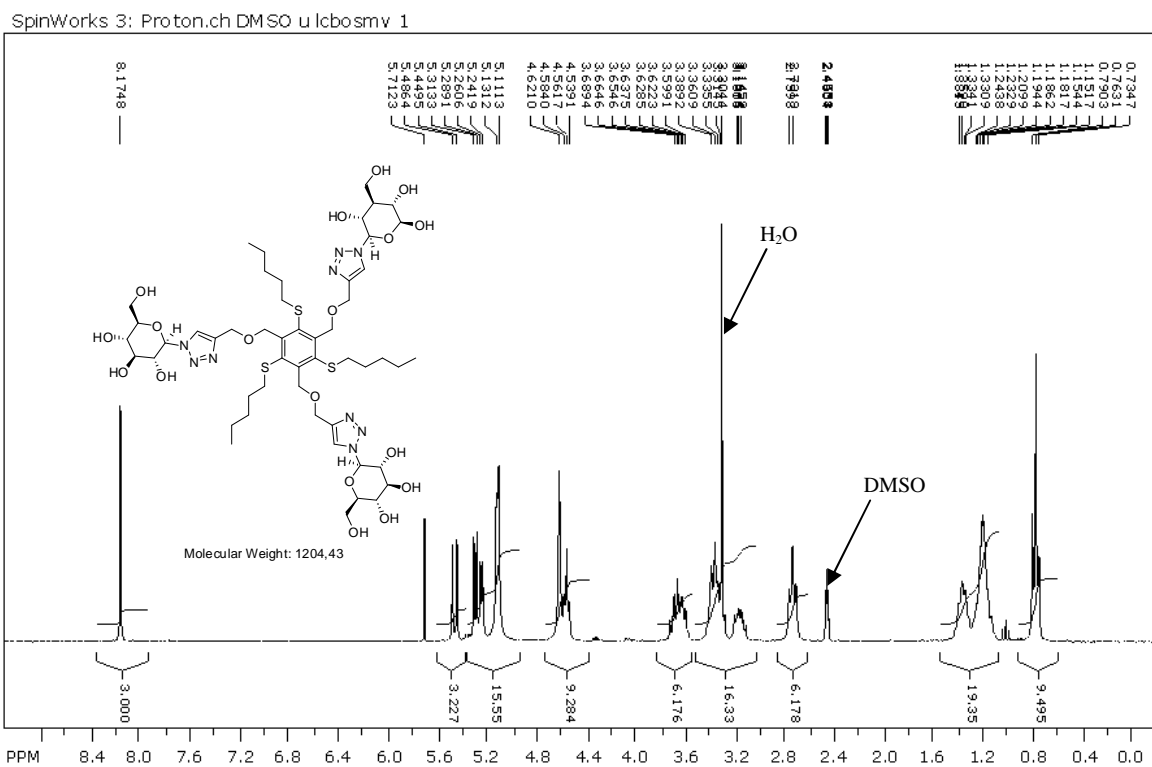

<sup>1</sup>H NMR (DMSO) for compound C5Glu3.

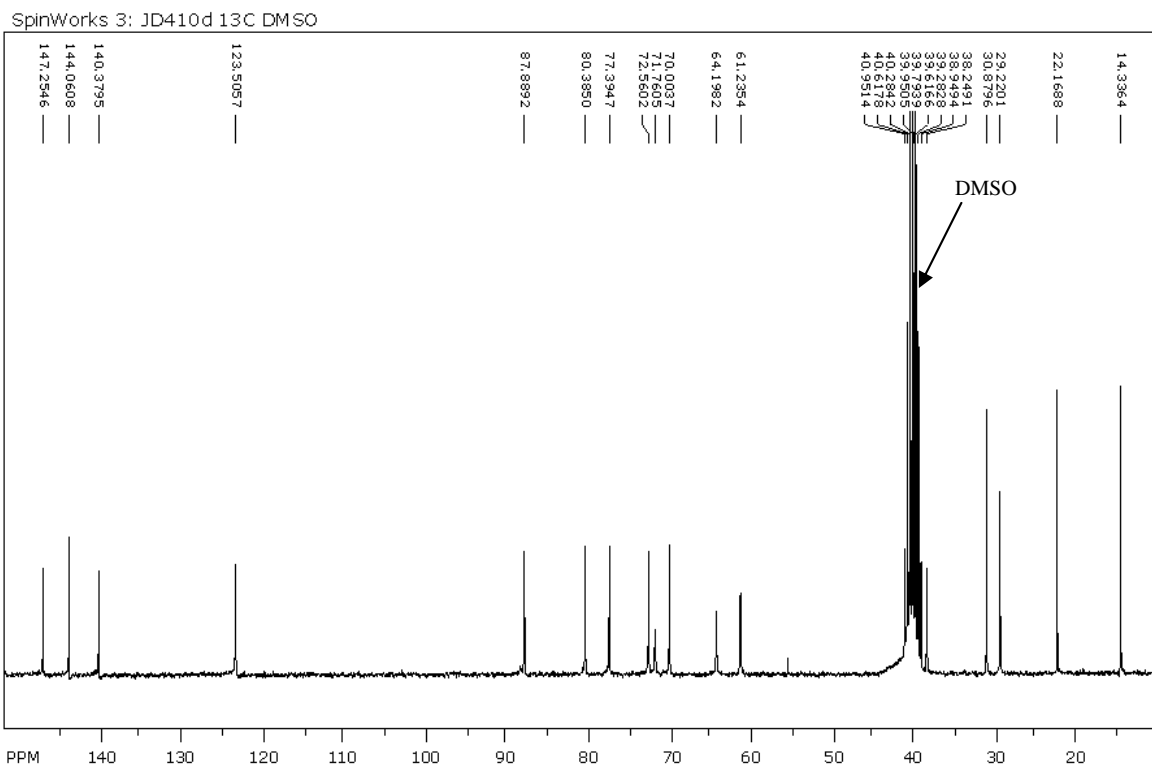

<sup>13</sup>C NMR (DMSO) for compound C5Glu3.

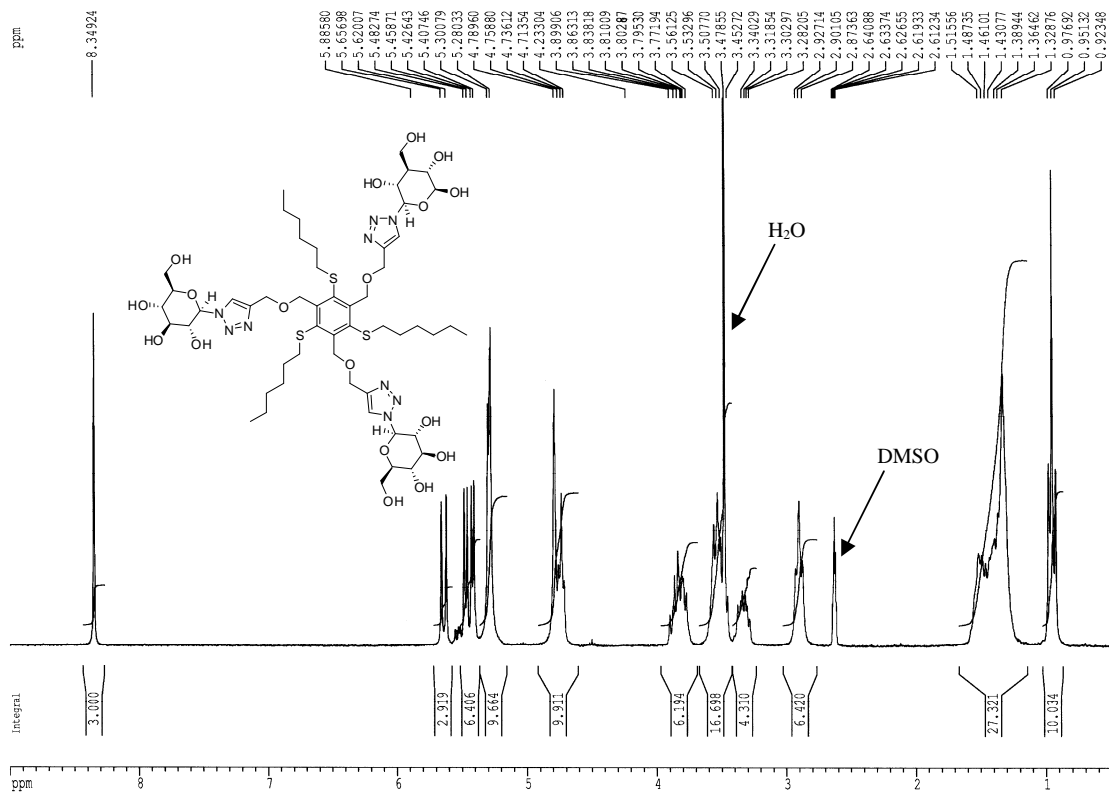

**<sup>1</sup>H NMR (DMSO) for compound C6Glu3.**

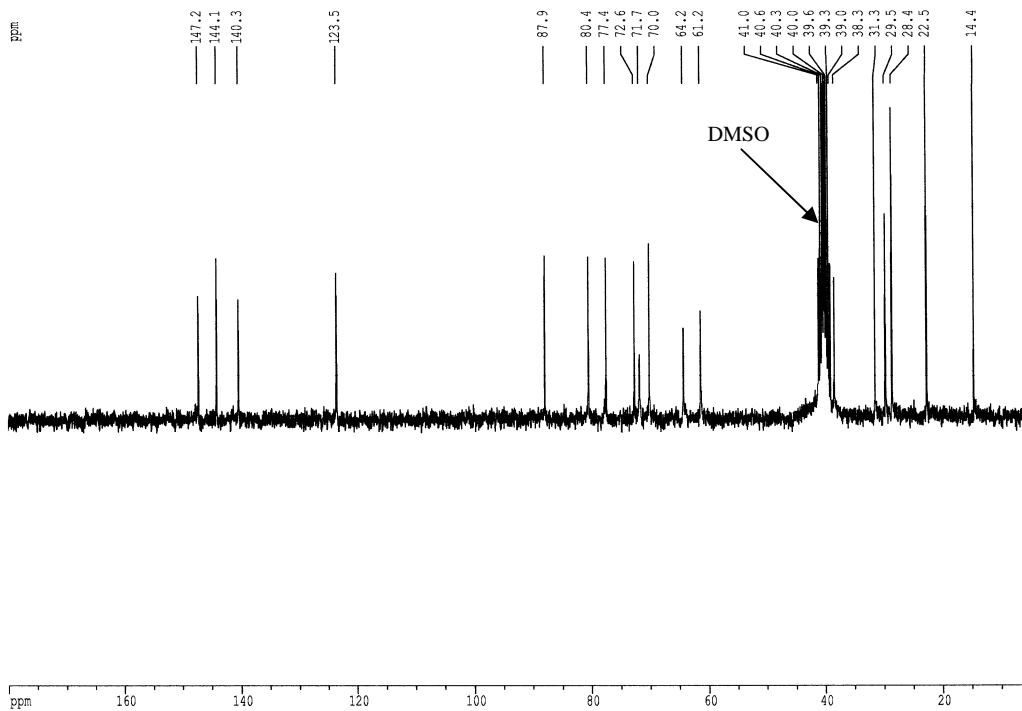

**<sup>13</sup>C NMR (DMSO) for compound C6Glu3.**

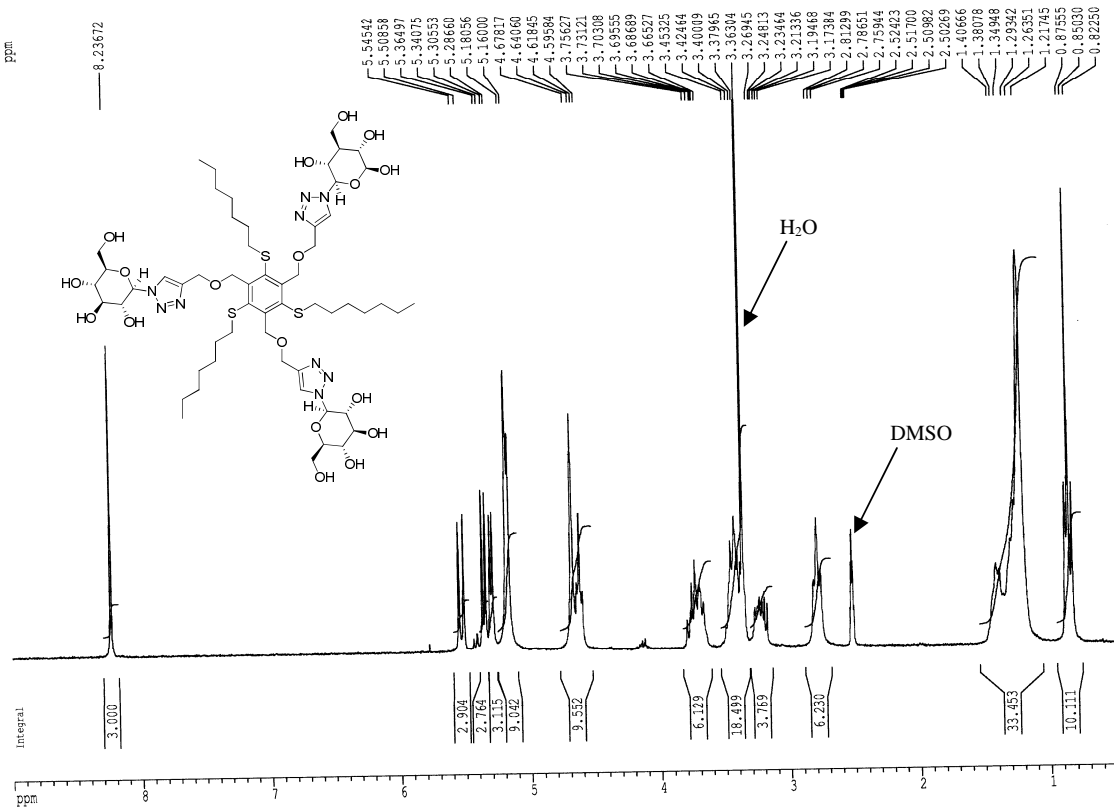

<sup>1</sup>H NMR (DMSO) for compound C7Glu3.

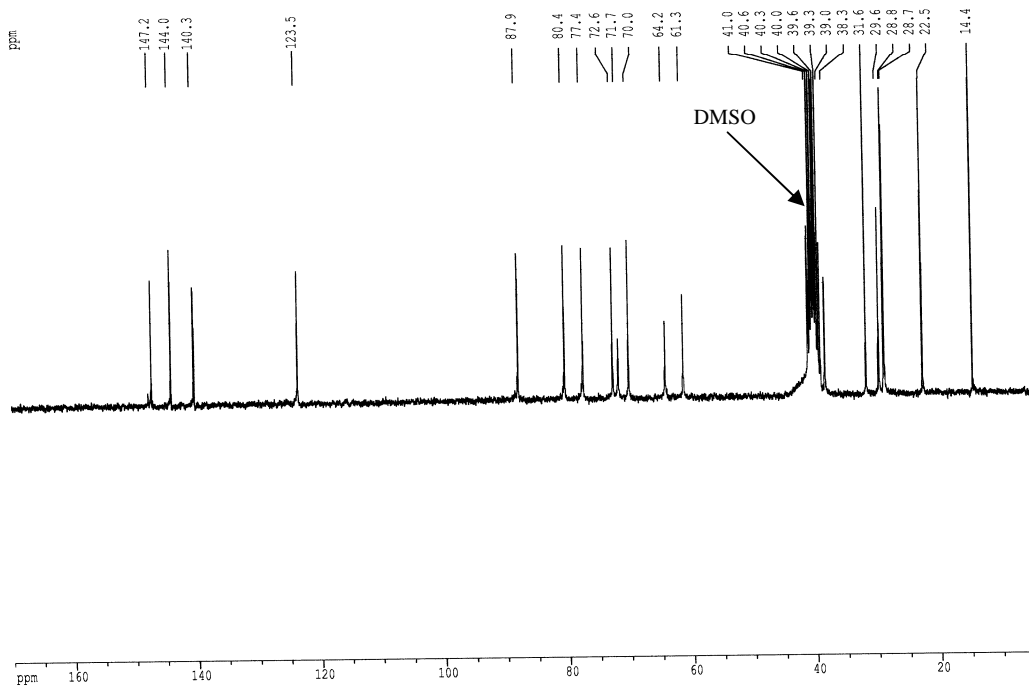

<sup>13</sup>C NMR (DMSO) for compound C7Glu3.

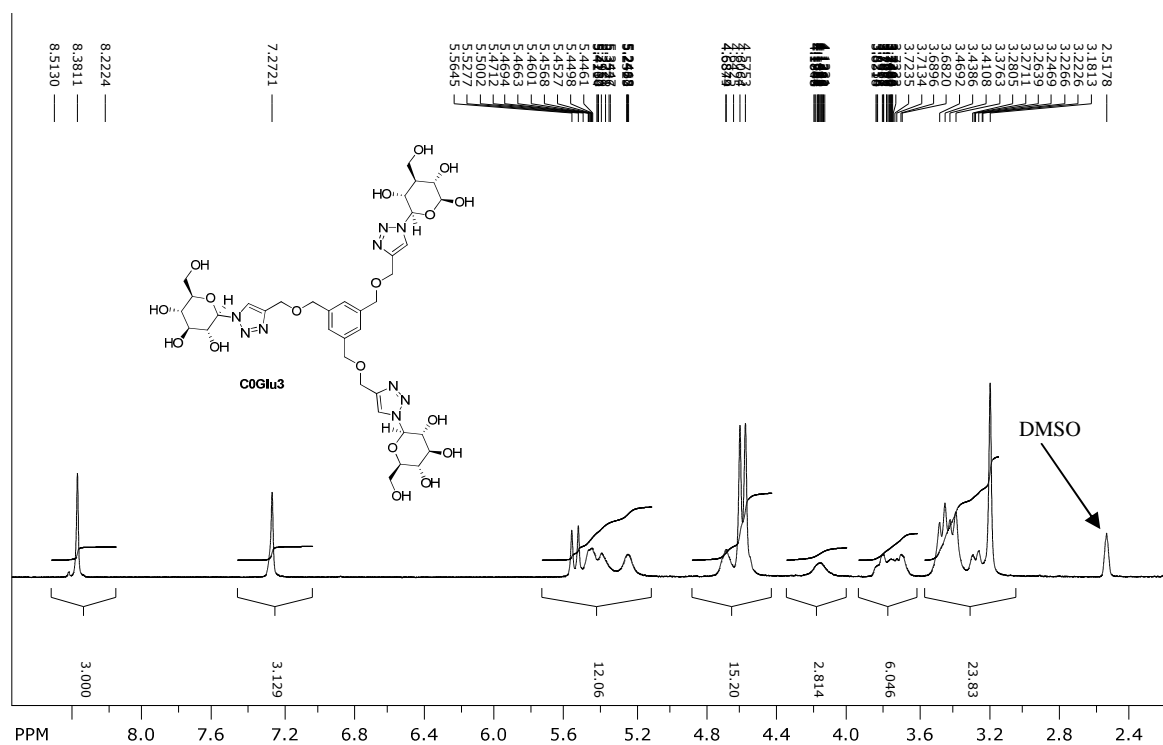

**<sup>1</sup>H NMR (DMSO) for compound C0Glu3.**

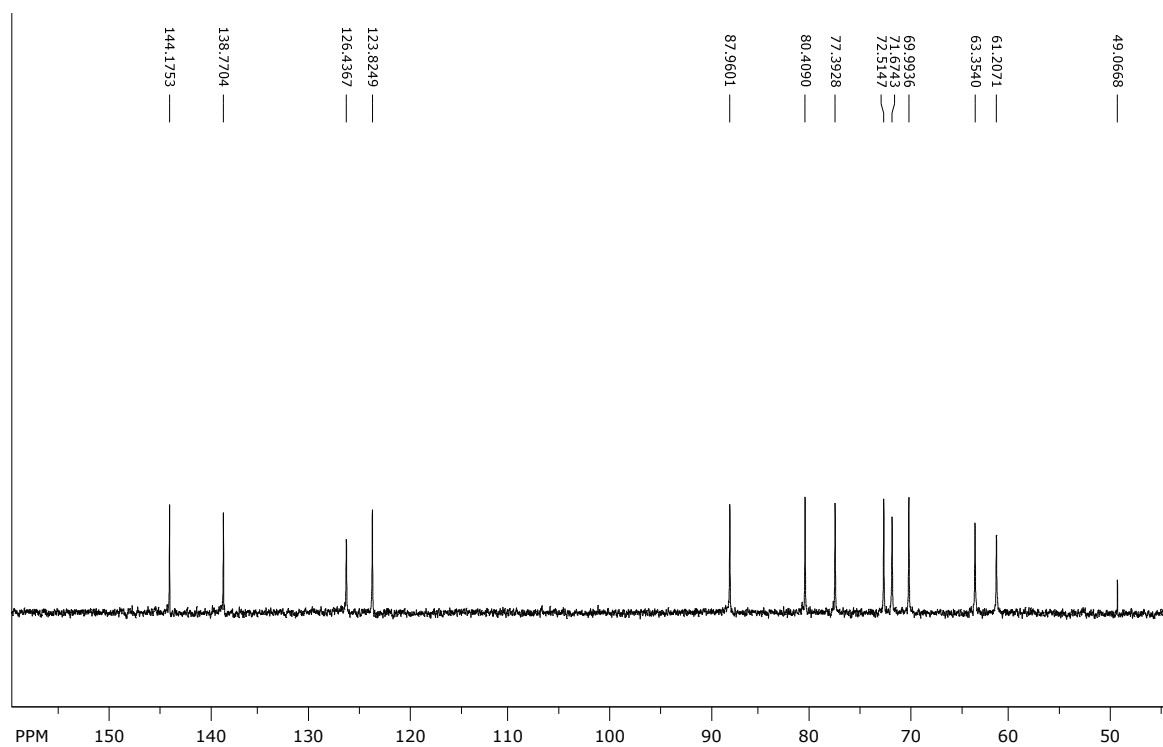

**<sup>13</sup>C NMR (DMSO) for compound C0Glu3.**

### Electron microscopy visualisation by negative staining

A solution of the compound **C7Glu3** at 10 mg/mL was sonicated with a microprobe during 15 min and/or 1 h in a bath at 50°C to allow the formation of vesicles. The solutions were passed through a 0.45 µm filter. A drop of the sample was layed down on a metallic grid coated with a film of carbon and the excess of liquid was imbibed with a blotting paper. Then, a drop of a 3% ammonium molybdate was put on the grid. We waited 30 s to optimise the adsorption and the excess of liquid was removed again. The visualisation by electron microscopy with negative coloration was monitored on a Philips CM/2 transmission electron microscope.

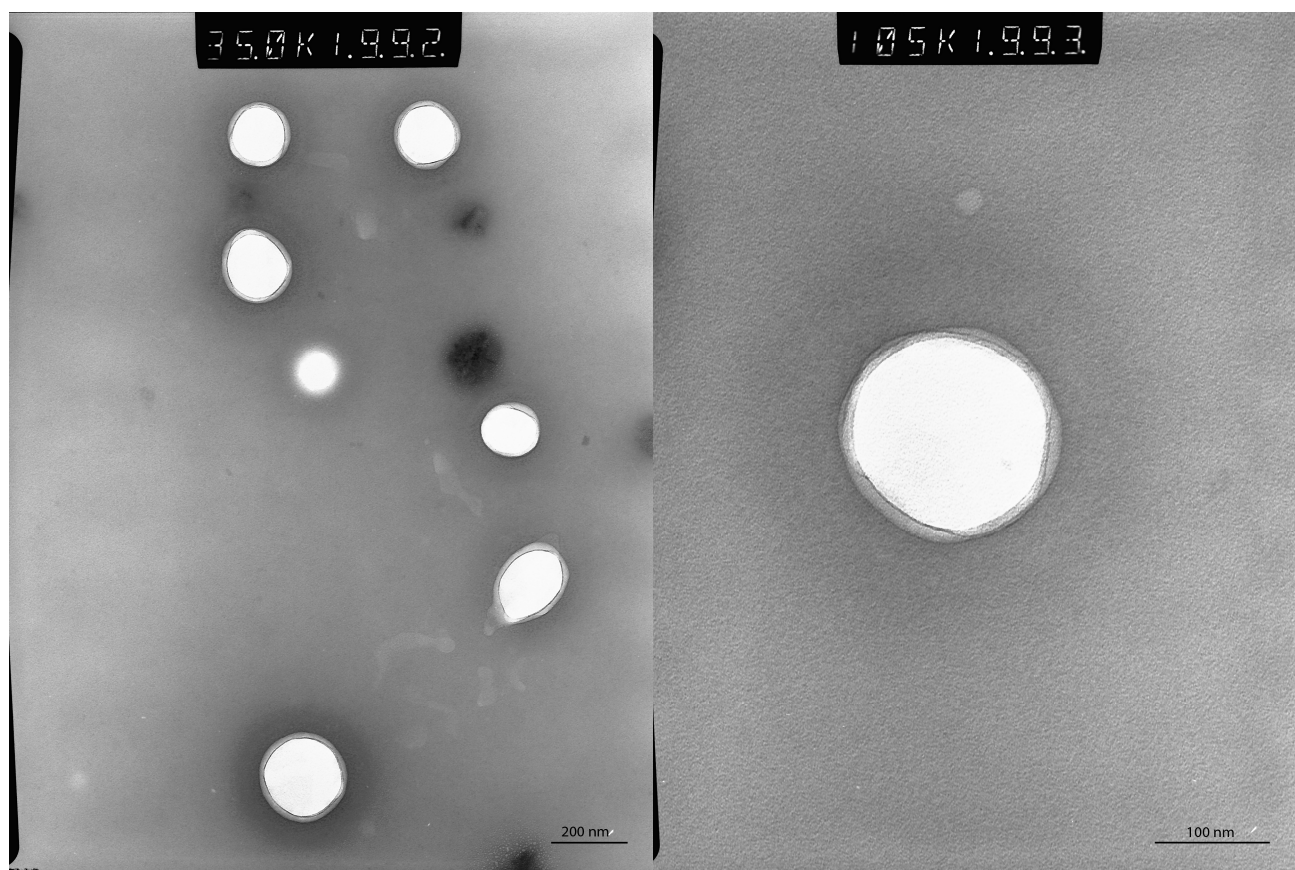

**Figure 1.** Pictures of compound **C7Glu3**.

The same sonicated samples was analysed by DLS. These results were collected in the table below and compared to particle sizes found by TEM.

**Table 1.** Data of vesicles for compound **C7Glu3** measured by DLS.

| Compound      | d (nm) DLS | % (volume) | d <sup>1/2</sup> (nm) | Count rate (kcps) | d (nm) MET <sup>a</sup> |
|---------------|------------|------------|-----------------------|-------------------|-------------------------|
| <b>C7Glu3</b> | 538.0      | 52%        | 149.7                 | 269.7             | 167-233                 |

<sup>a</sup> Values correspond to the interval between the smaller and the bigger particles observed on the pictures.



## Small Angle X-Ray Scattering

**Table 2** SAXS data of **CnGlu3** (n= 3, 4, 5) vs. concentration (g.L<sup>-1</sup>):

| Entry         | c (g/L) | MW <sup>#</sup> (g/mol) | Rg <sup>§</sup> (nm) | H <sup>¶</sup> (nm) | Nagg |
|---------------|---------|-------------------------|----------------------|---------------------|------|
| <b>C3Glu3</b> | 2.4     | 941.2                   | 1.18                 | n a                 | 0.8  |
|               | 44      | 3003.4                  | 1.40                 | n a                 | 2.7  |
| <b>C4Glu3</b> | 2.6*    | 2480.8                  | 1.56                 | n a                 | 2.1* |
|               | 42      | 8280.0                  | 1.93                 | 5.8                 | 7.1  |
| <b>C5Glu3</b> | 2.8     | 16244                   | 3.61                 | 6.4                 | 13   |
|               | 5.6     | 19355                   | 3.76                 | 7.9                 | 16   |
|               | 11.2    | 24995                   | 4.19                 | 10.5                | 20   |
|               | 22.5    | 32452                   | 4.85                 | 14                  | 27   |
|               | 42      | 45513                   | 5.67                 | 19.8                | 38   |

<sup>#</sup> Molecular mass calculated from forward intensity; <sup>§</sup> Radius of gyration obtained from Guinier approximation; <sup>¶</sup> Height of rod obtained from SASfit models

\* This value is an intermediate state between the monomer, which could be characterized at CMC or below, and the final aggregate. Measurement below CMC could not be done because of a poor SAXS signal below the CMC or CAC.

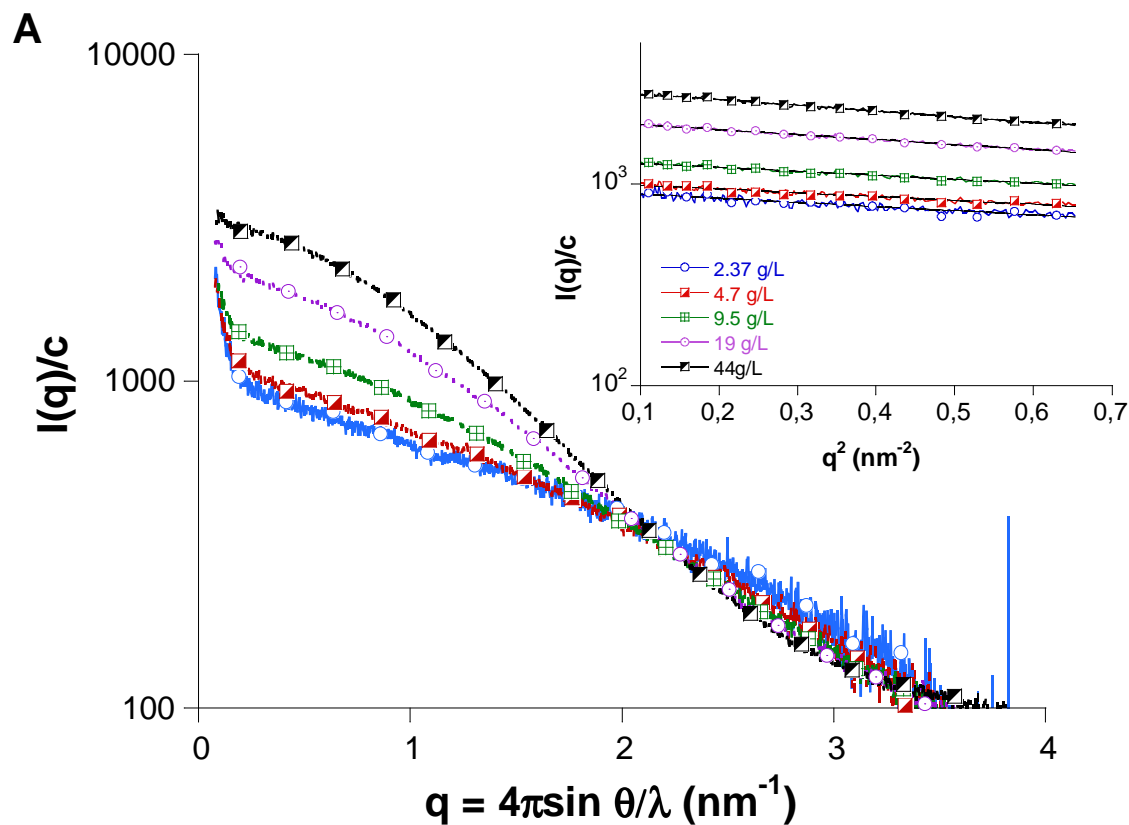

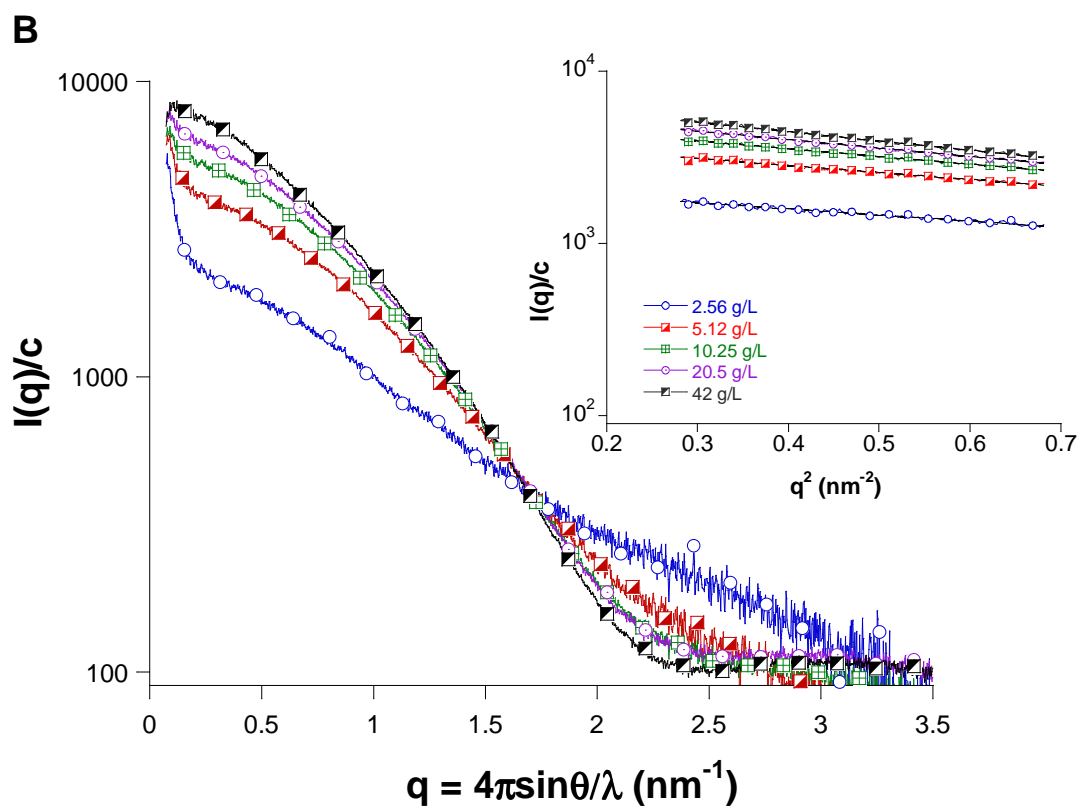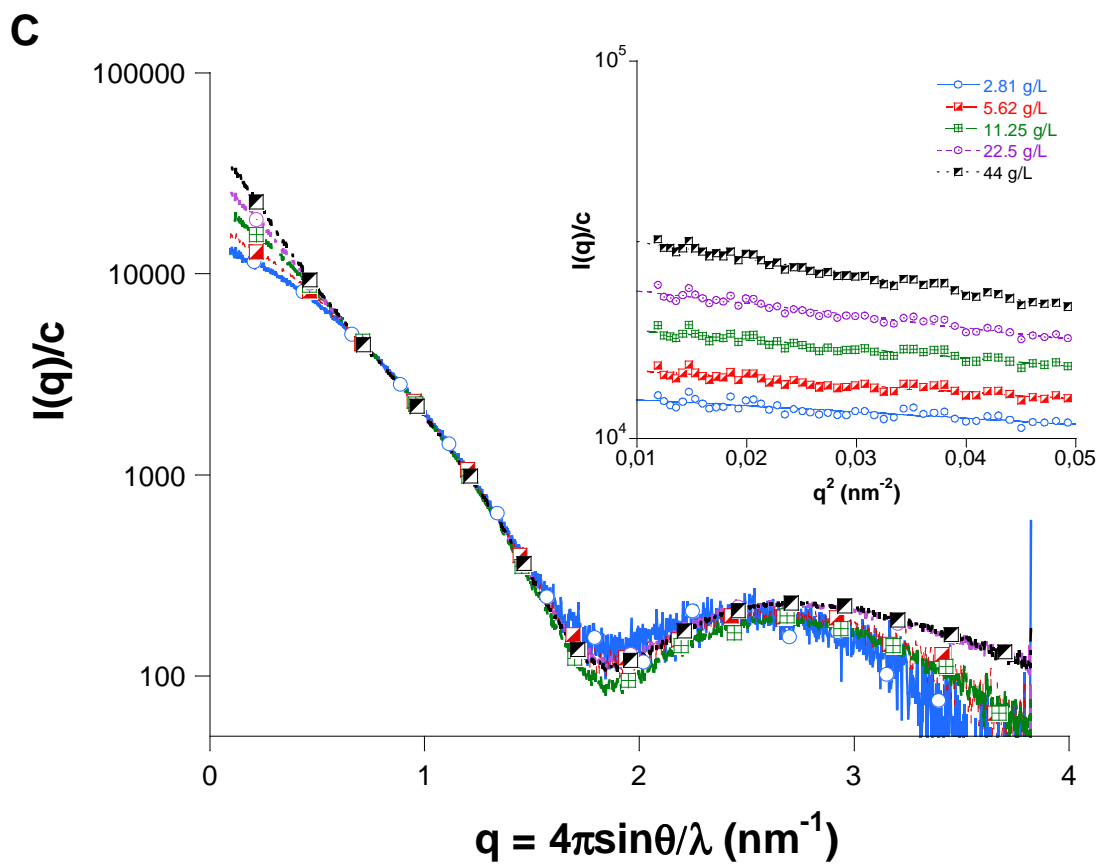

**Figure 2.** SAXS patterns of C3Glu3 (A) C4Glu3 (B) and C5Glu3 (C) as a function of concentration. Guinier plots are shown in insert.

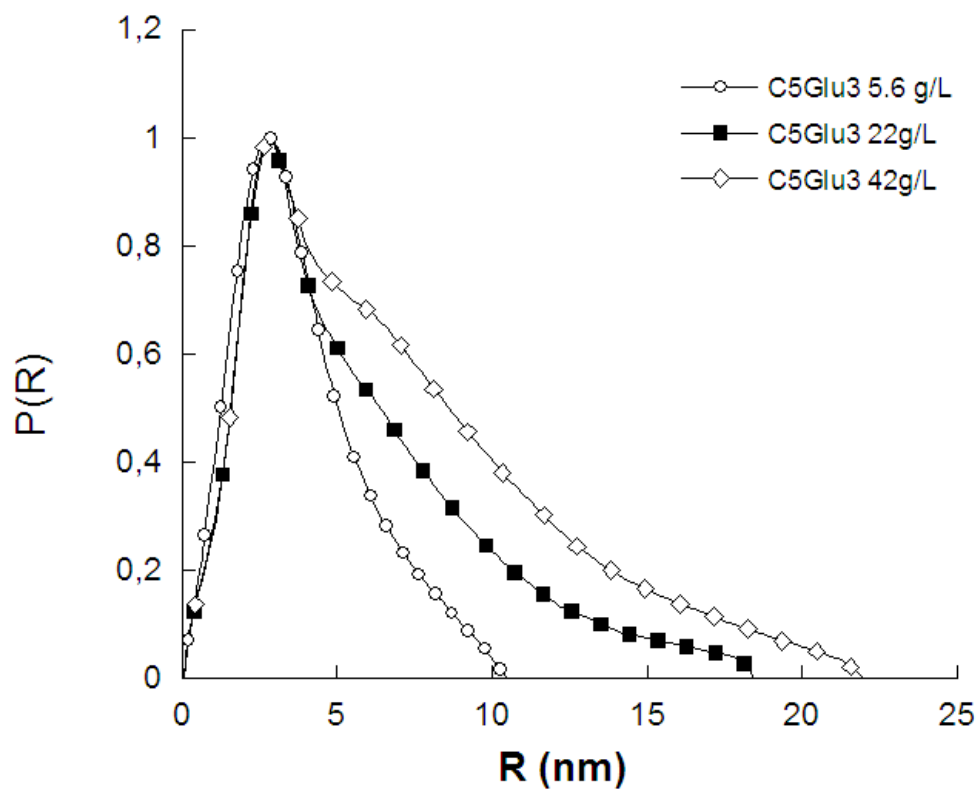

Figure 3. Pair distribution function of C5Glu3 at different concentrations
